# Supplementary material for: Efficient Total Synthesis of Lissodendrin B, 2-Aminoimidazole Marine Alkaloids Isolated from Lissodendoryx (Acanthodoryx) fibrosa
Source: MDPI journal article supplement (doi:10.3390/md18010036), 2019-12-31
Supplement: s1 [file s1]

Supplementary Material

Efficient total synthesis of Lissodendrin B, 2-aminoimidazole  
marine alkaloids isolated from *Lissodendoryx* (*Acanthodoryx*)  
*fibrosa*

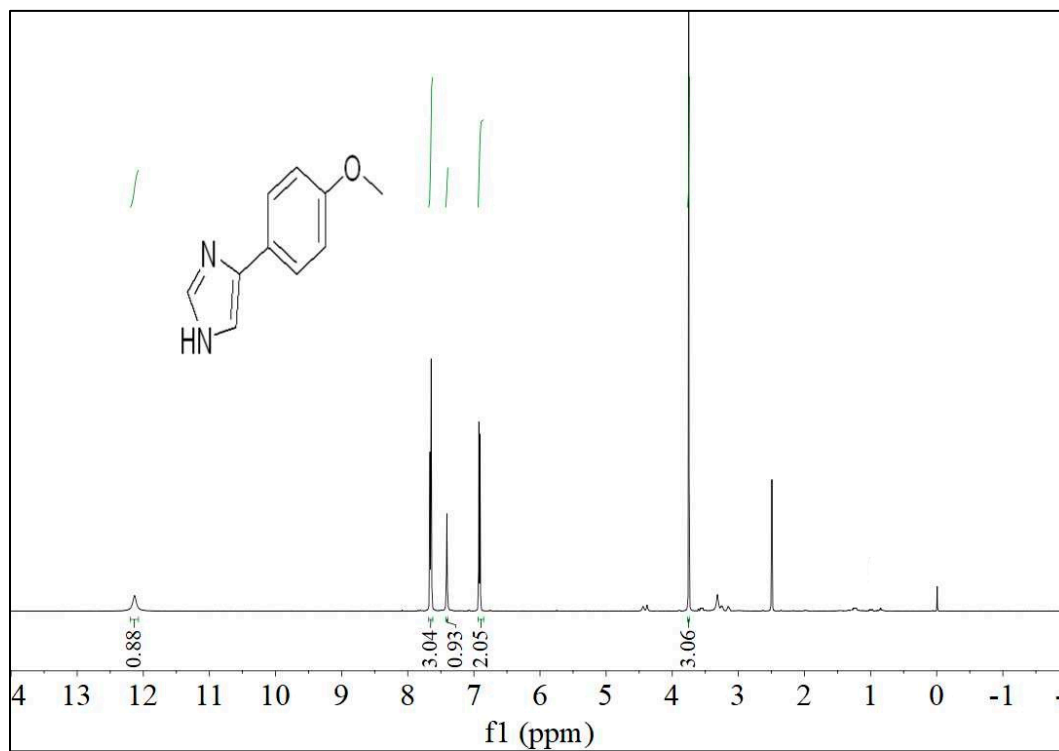

Figure S1 <sup>1</sup>H NMR Spectrum of **2** in DMSO-d<sub>6</sub>

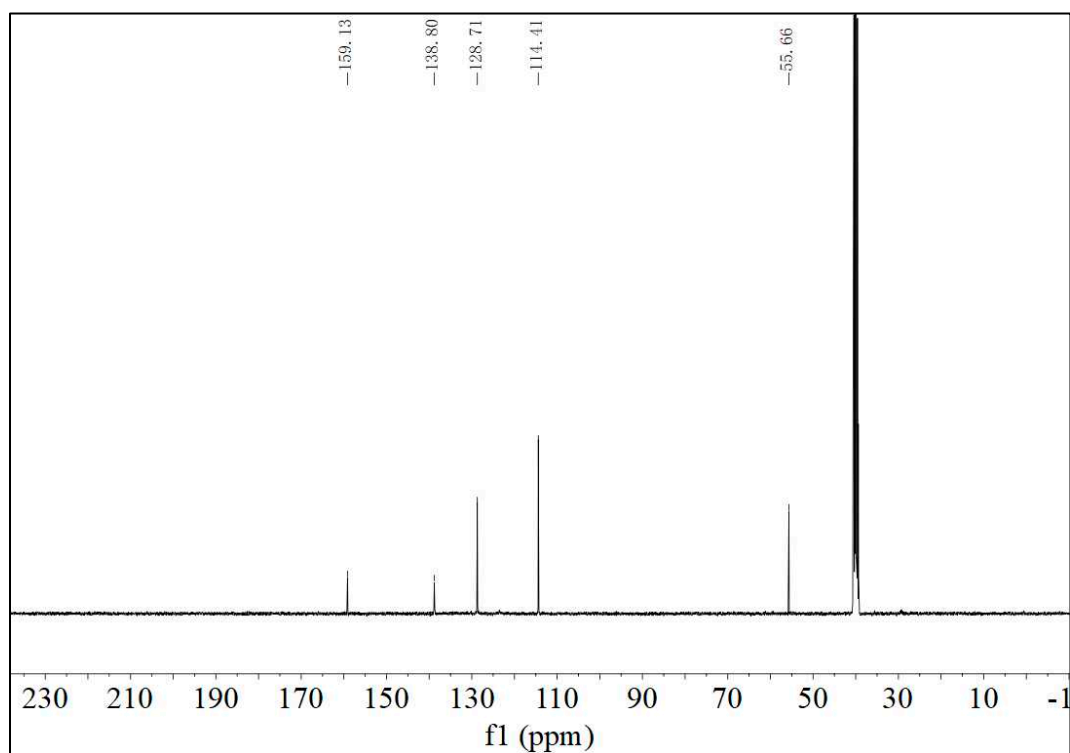

Figure S2 <sup>13</sup>C NMR Spectrum of **2** in DMSO-d<sub>6</sub>

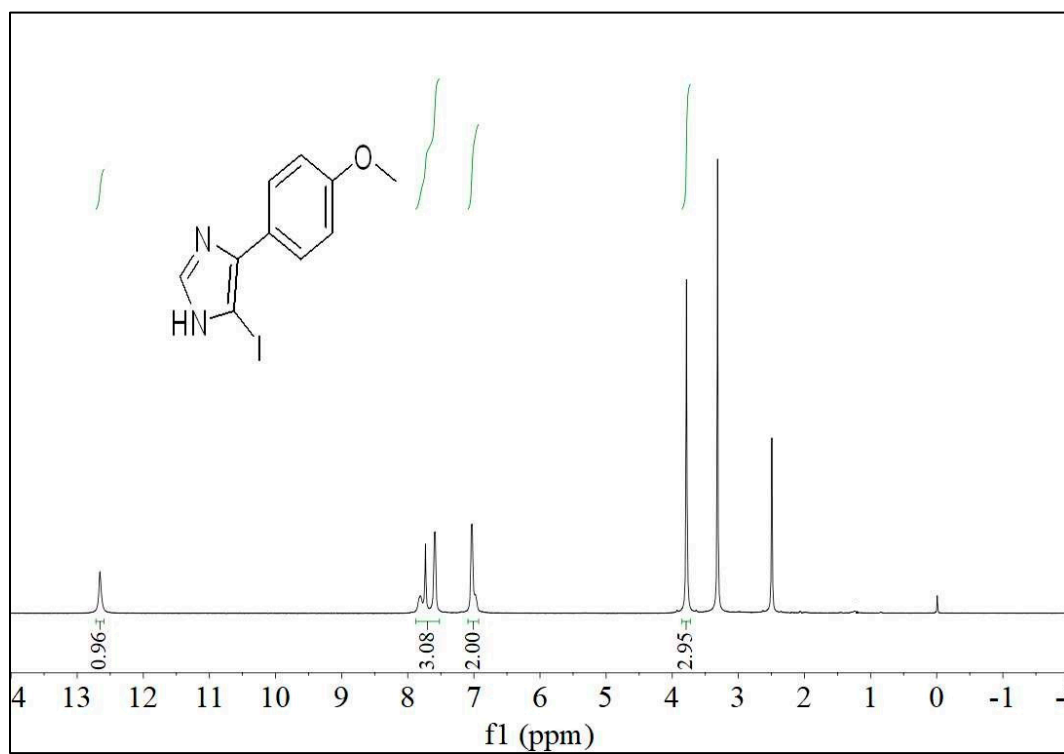

Figure S3 <sup>1</sup>H NMR Spectrum of **3** in DMSO-d<sub>6</sub>

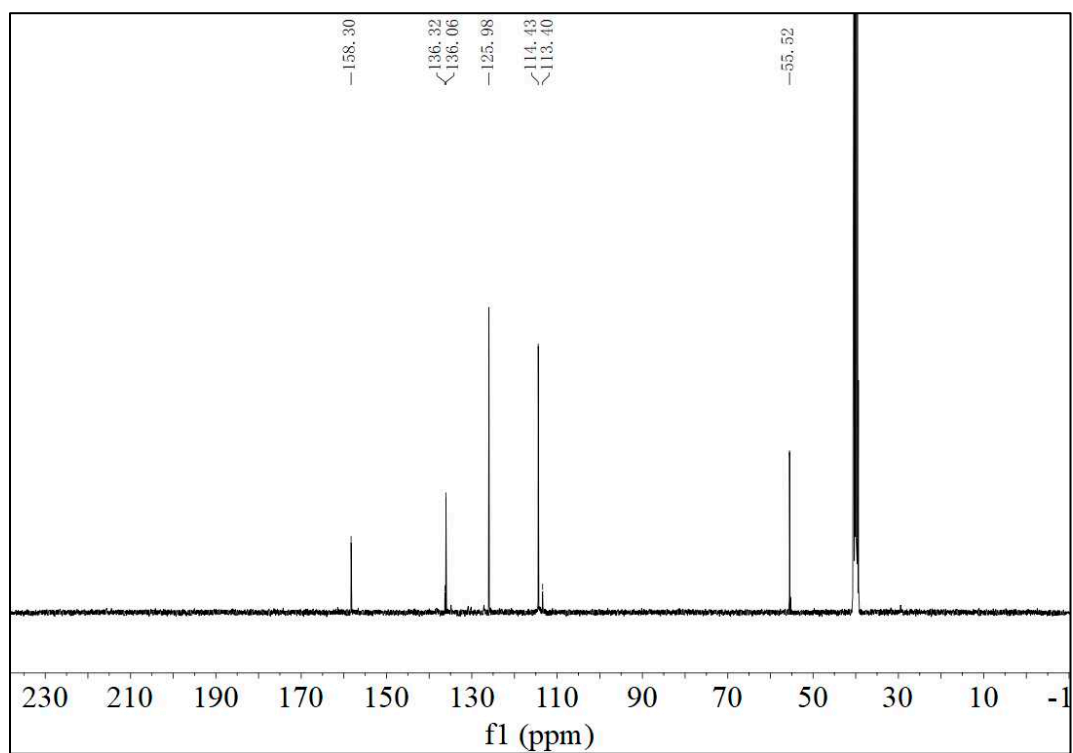

Figure S4 <sup>13</sup>C NMR Spectrum of **3** in DMSO-d<sub>6</sub>

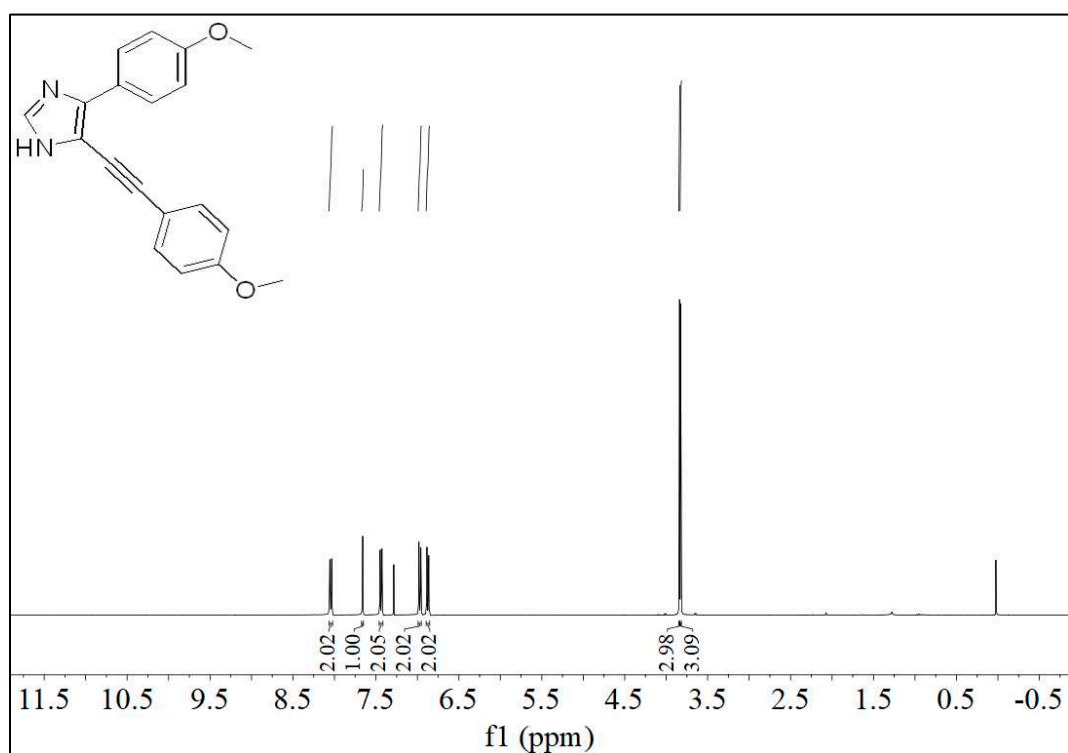

Figure S5 <sup>1</sup>H NMR Spectrum of **4** in Chloroform-d

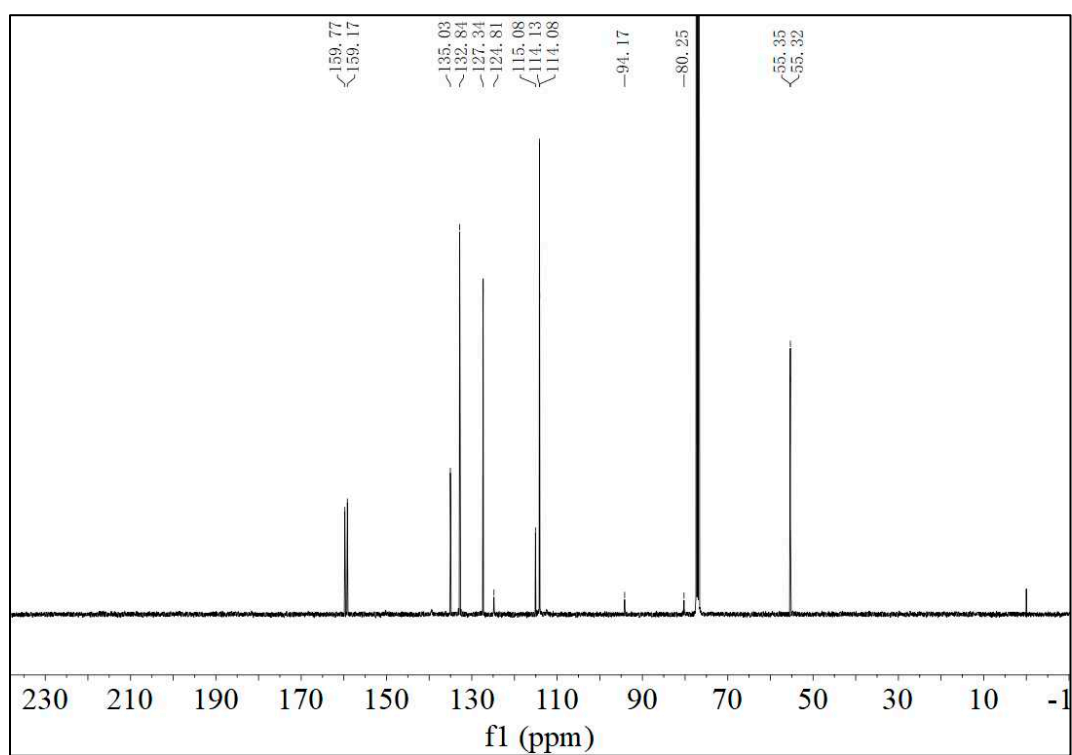

Figure S6 <sup>13</sup>C NMR Spectrum of **4** in Chloroform-d

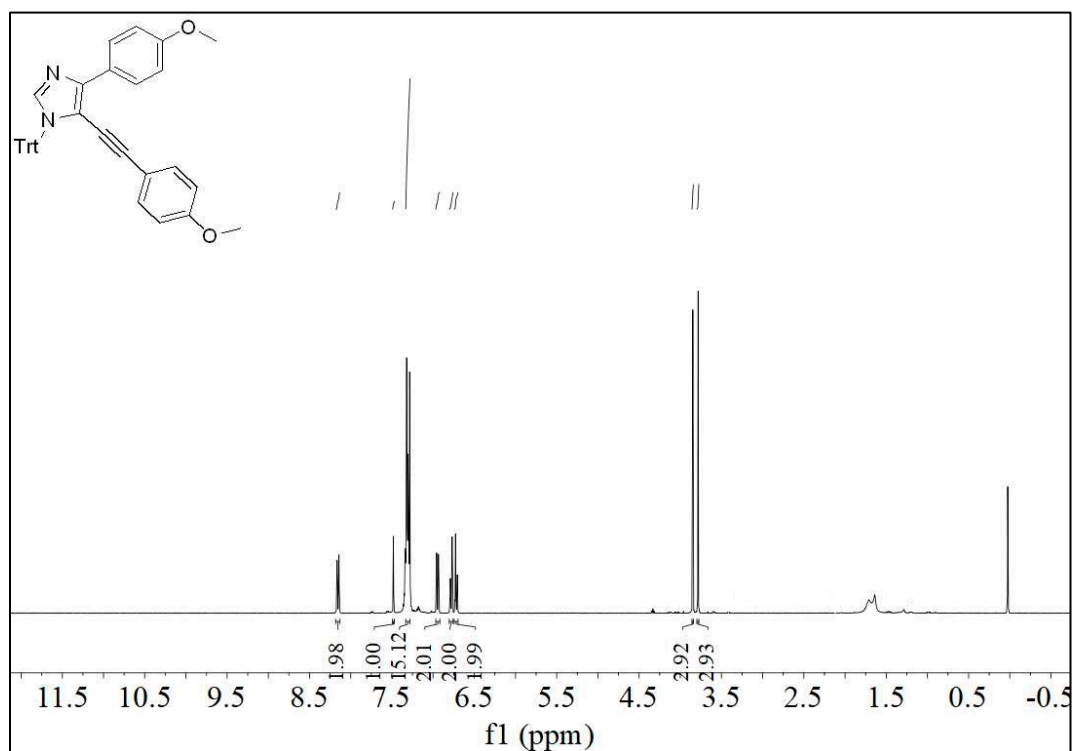

Figure S7 <sup>1</sup>H NMR Spectrum of 5 in Chloroform-d

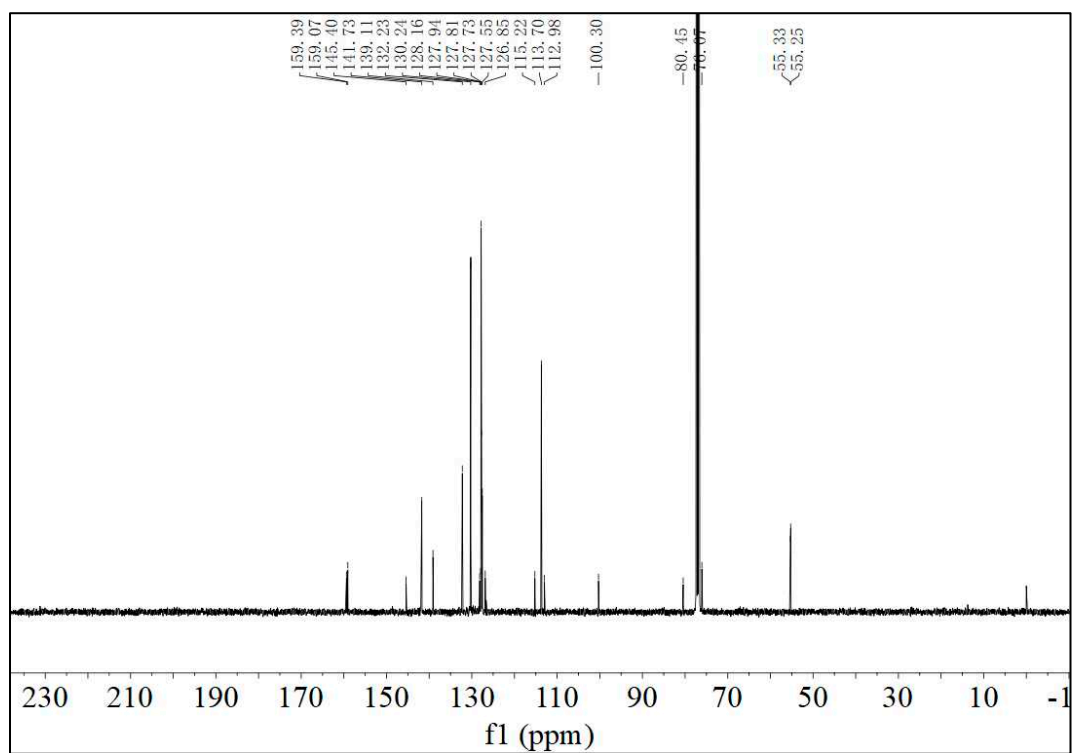

Figure S8 <sup>13</sup>C NMR Spectrum of 5 in Chloroform-d

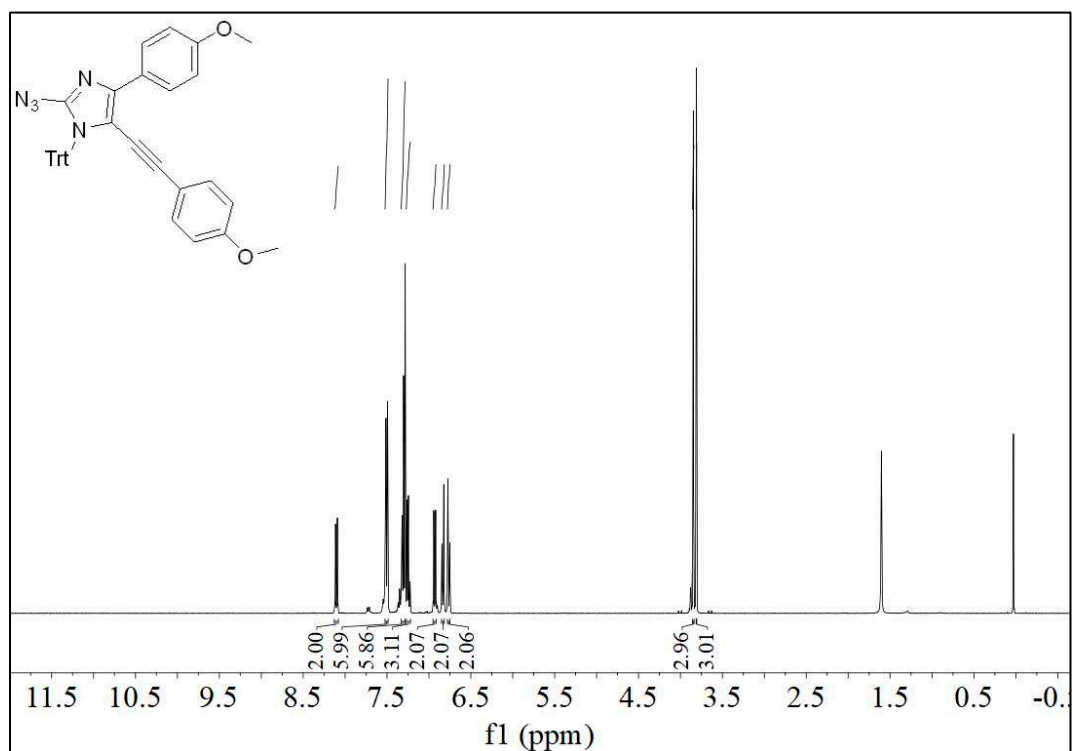

Figure S9 <sup>1</sup>H NMR Spectrum of 6 in Chloroform-d

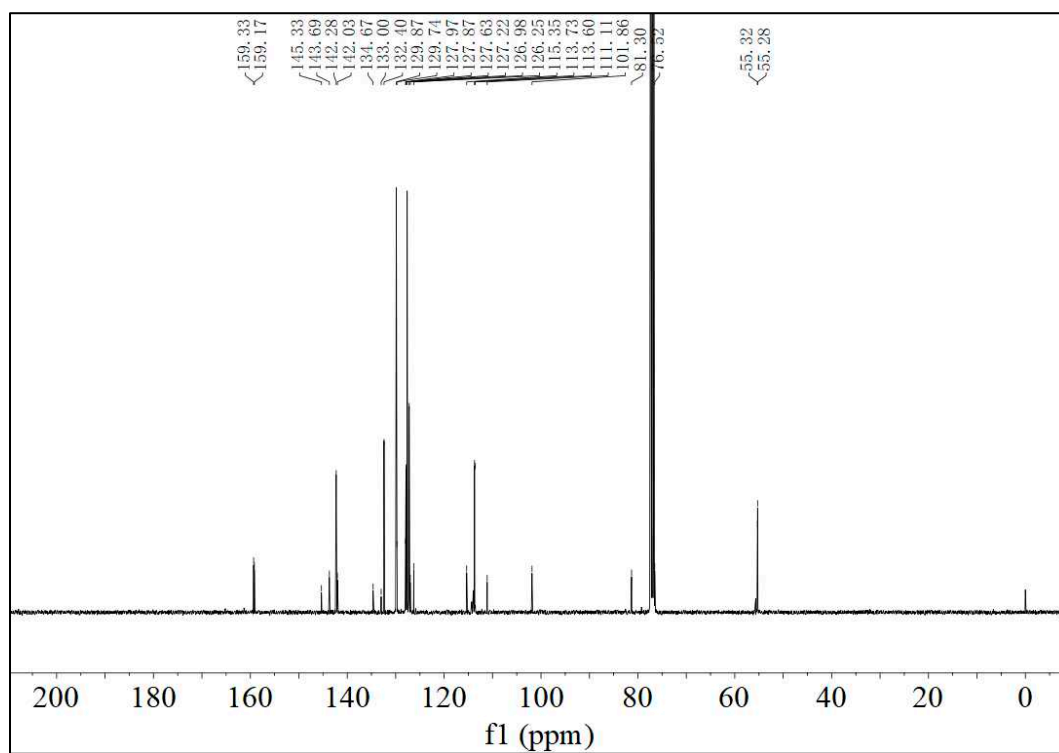

Figure S10 <sup>13</sup>C NMR Spectrum of 6 in Chloroform-d

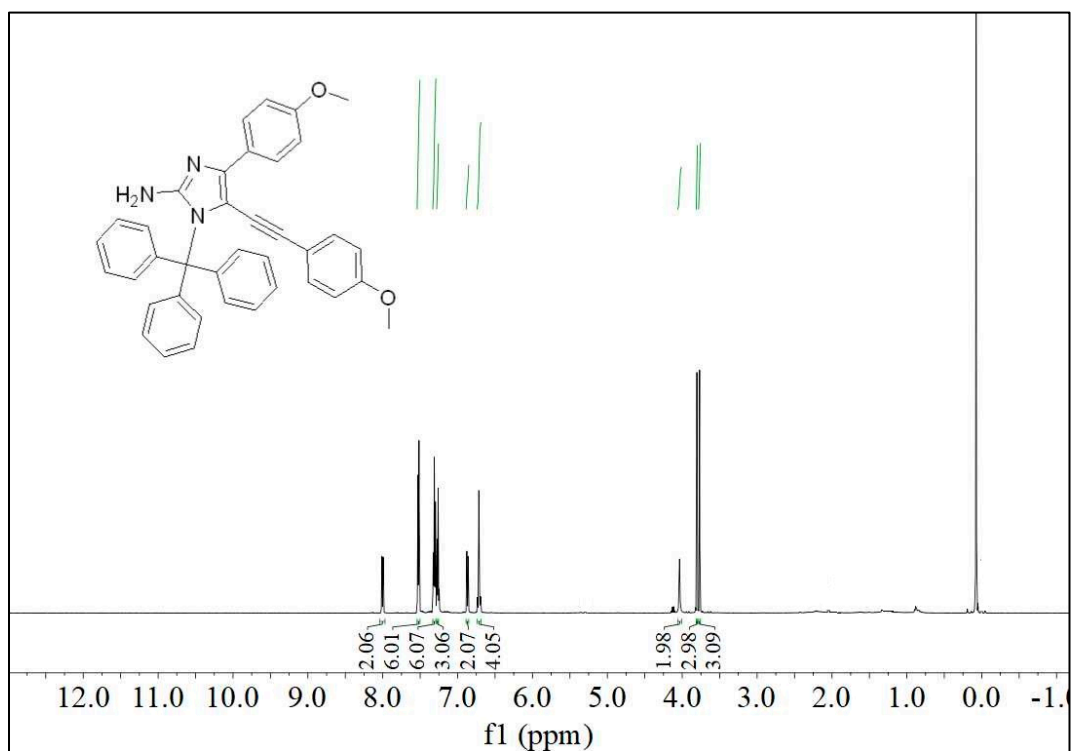

Figure S11 <sup>1</sup>H NMR Spectrum of 7 in Chloroform-d

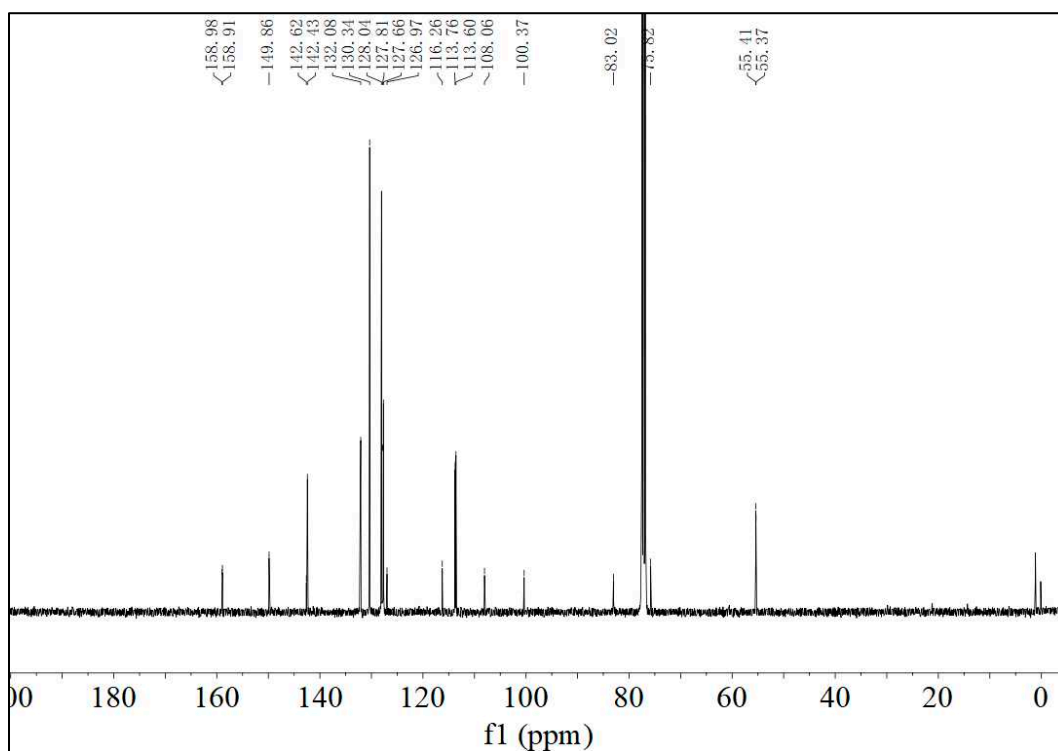

Figure S12 <sup>13</sup>C NMR Spectrum of 7 in Chloroform-d

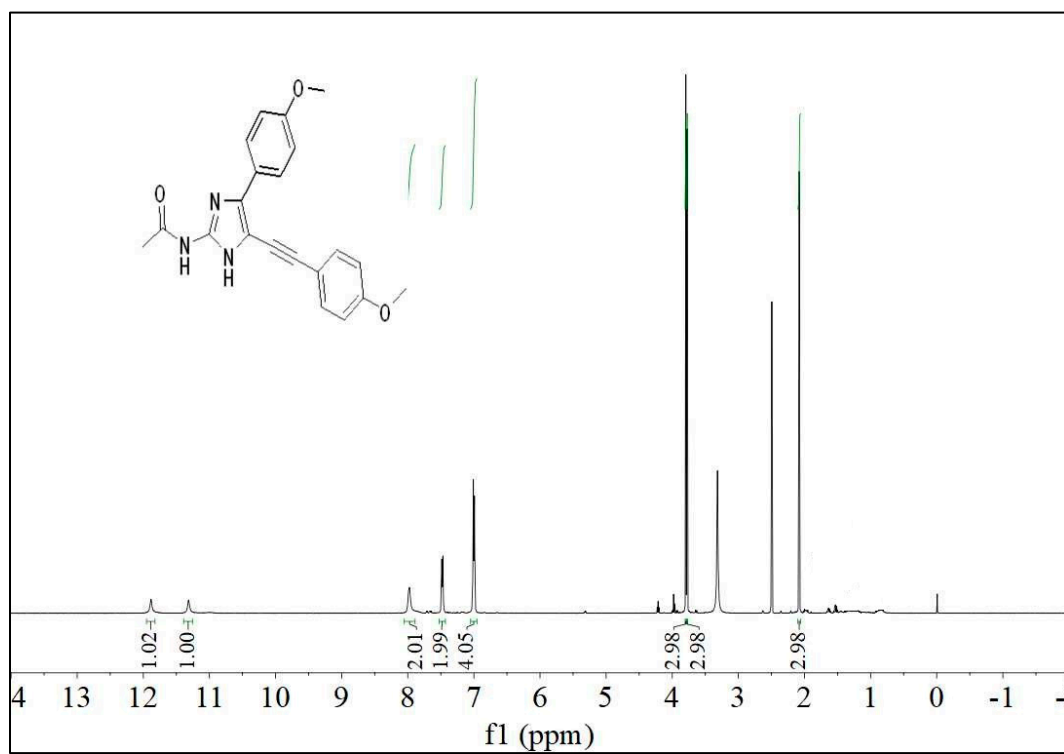

Figure S13 <sup>1</sup>H NMR Spectrum of **8** in DMSO-d<sub>6</sub>

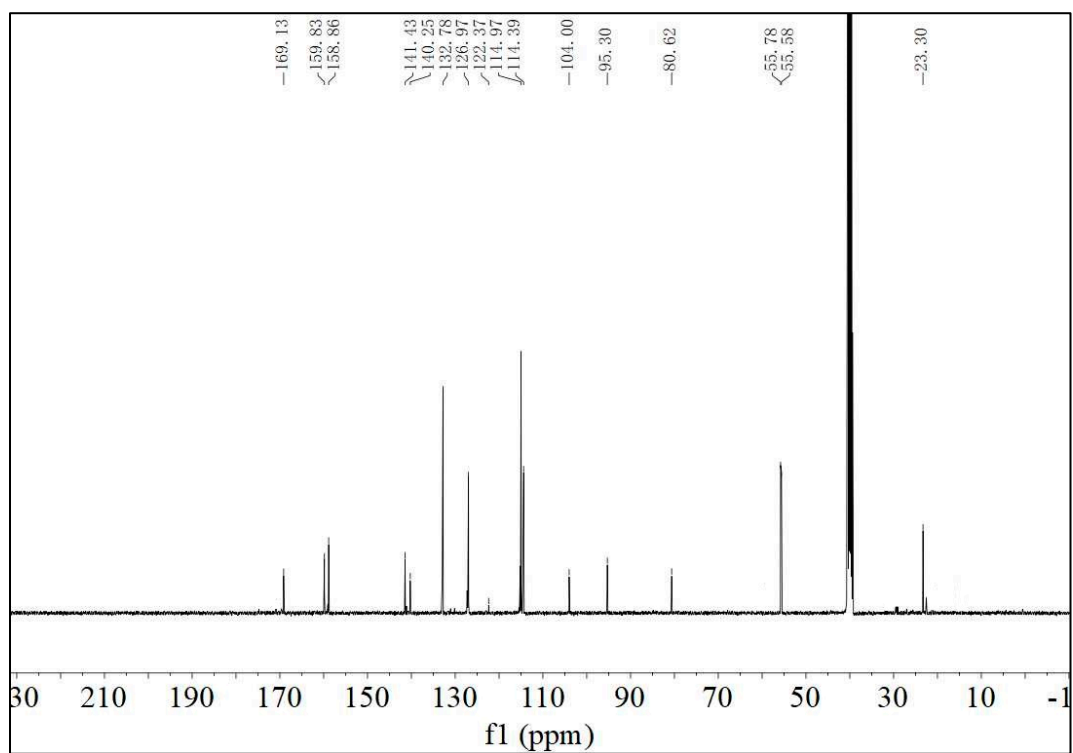

Figure S14 <sup>13</sup>C NMR Spectrum of **8** in DMSO-d<sub>6</sub>

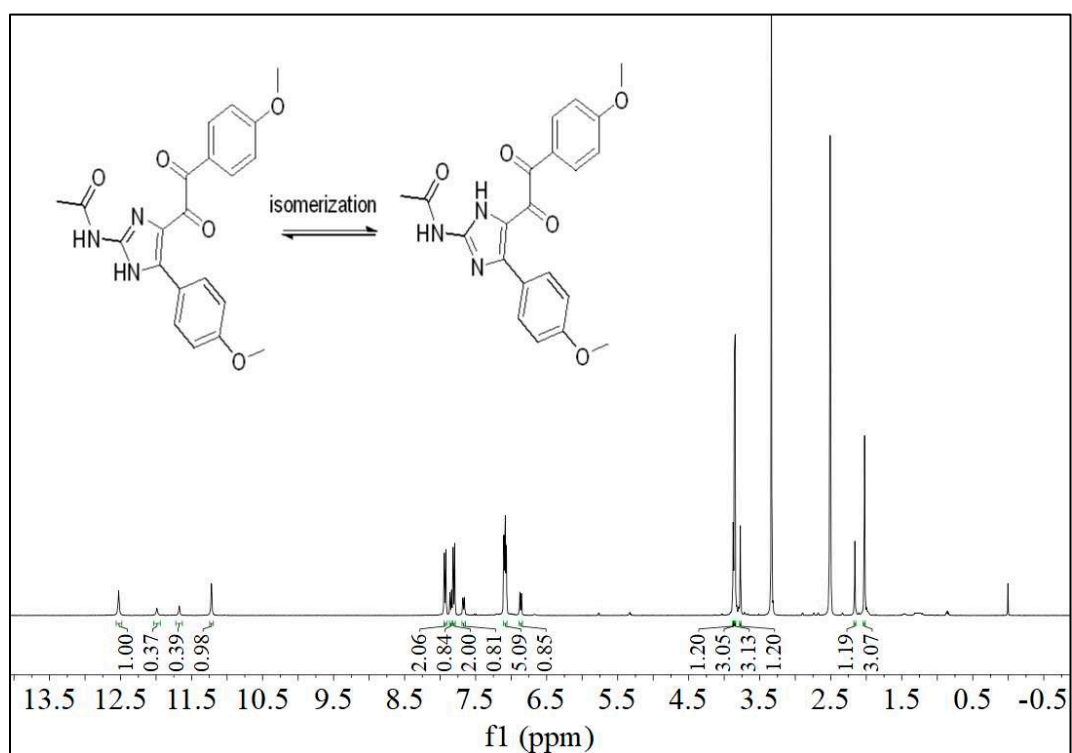

Figure S15  $^1\text{H}$  NMR Spectrum of **9** in  $\text{DMSO-d}_6$

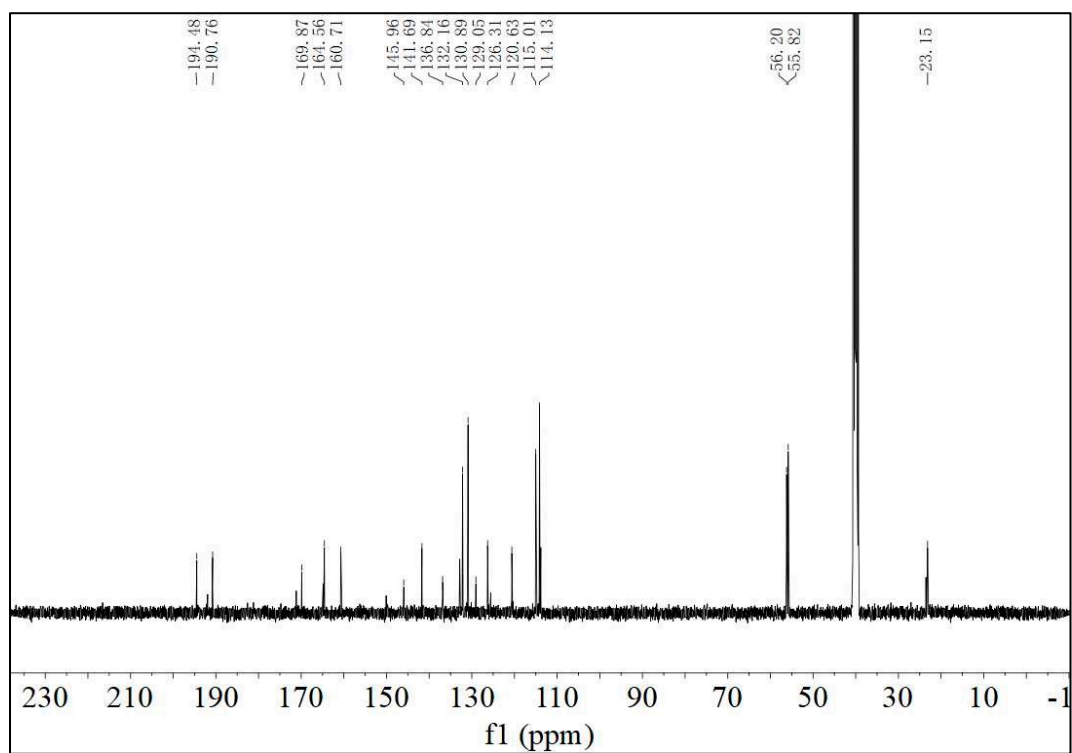

Figure S16  $^{13}\text{C}$  NMR Spectrum of **9** in  $\text{DMSO-d}_6$



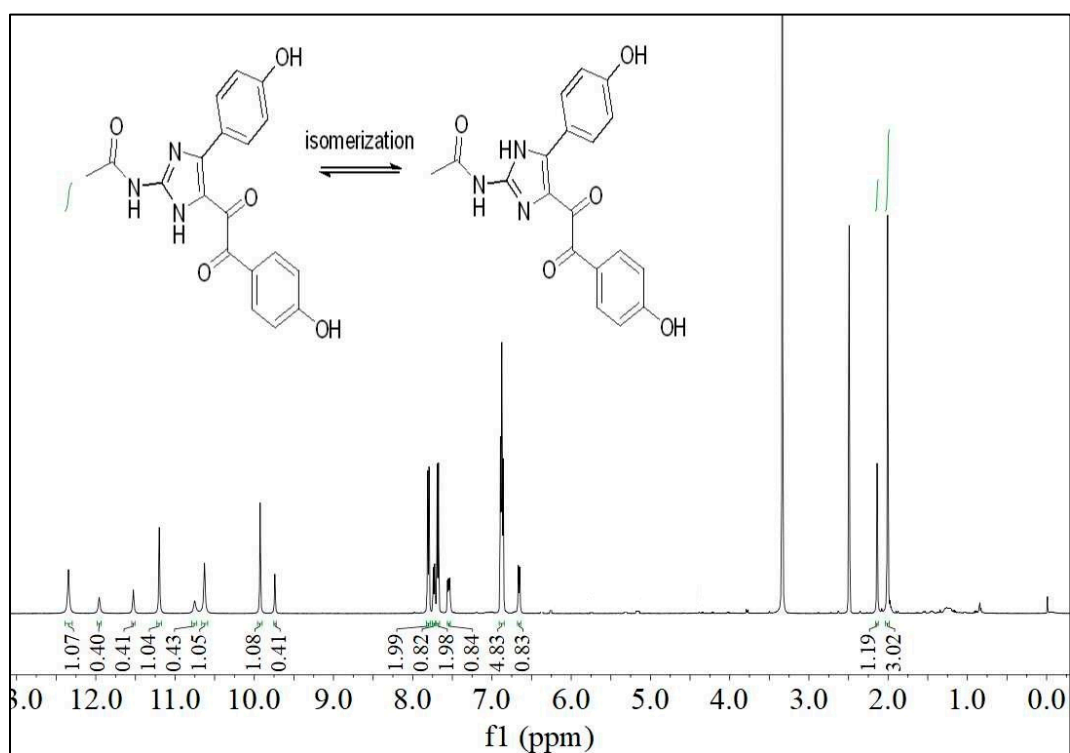

Figure S17  $^1\text{H}$  NMR Spectrum of **10** in  $\text{DMSO-d}_6$

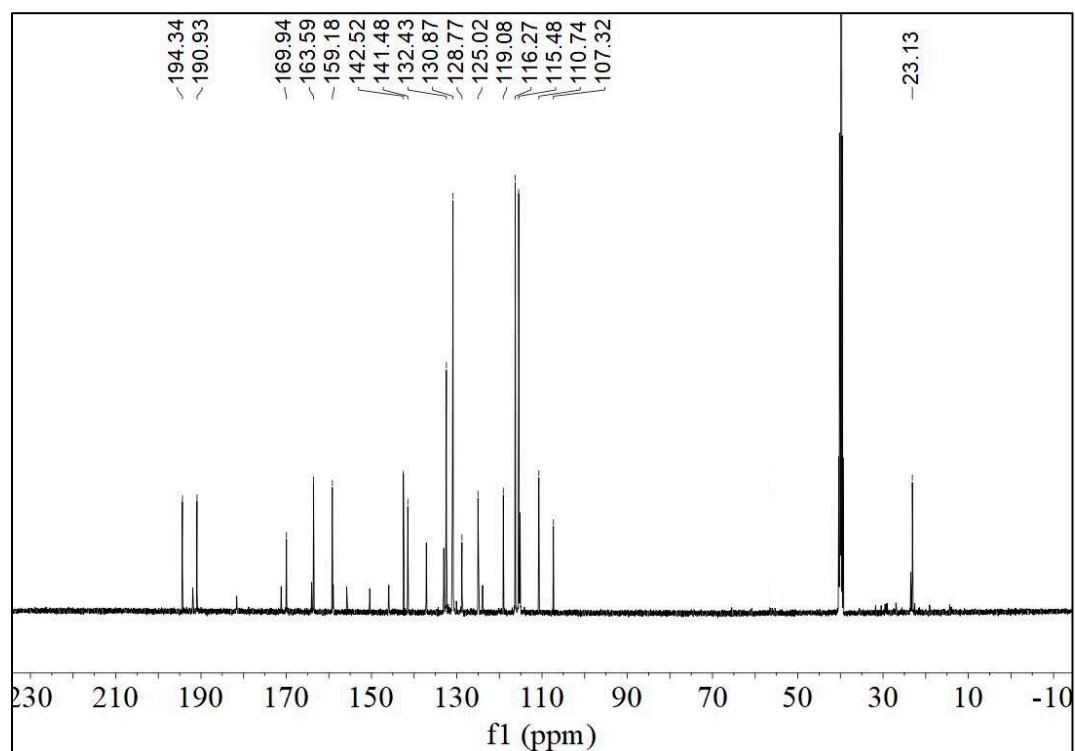

Figure S18  $^{13}\text{C}$  NMR Spectrum of **10** in  $\text{DMSO-d}_6$

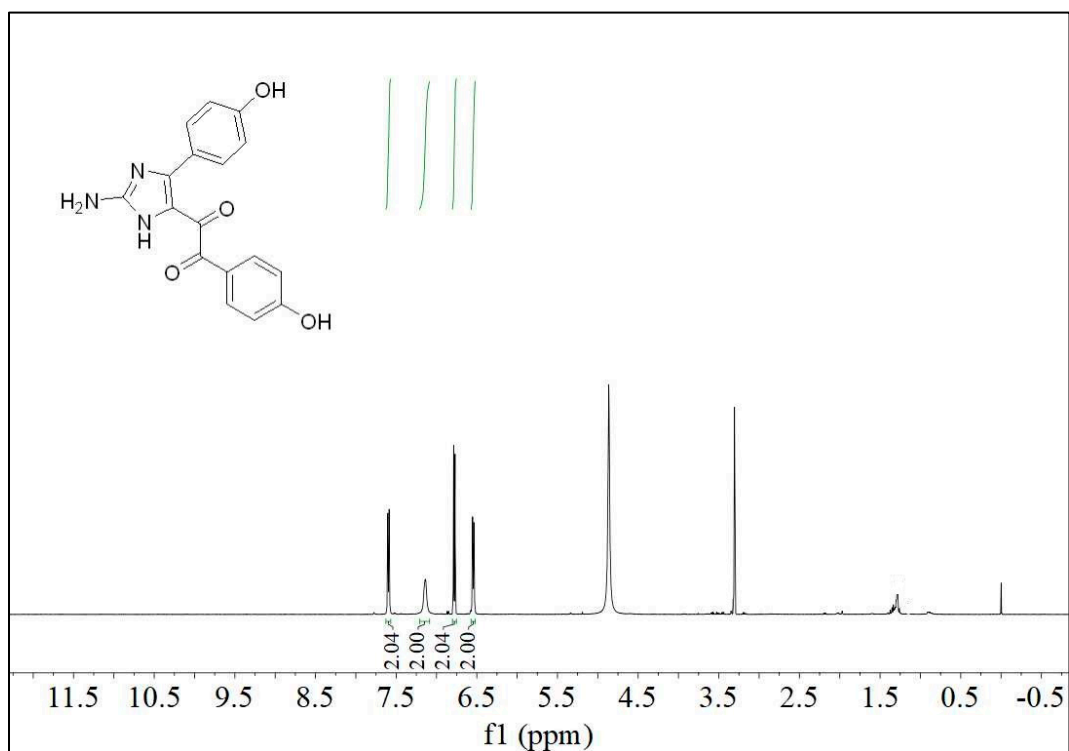

Figure S19 <sup>1</sup>H NMR Spectrum of **11** in Methanol-*d*<sub>4</sub>

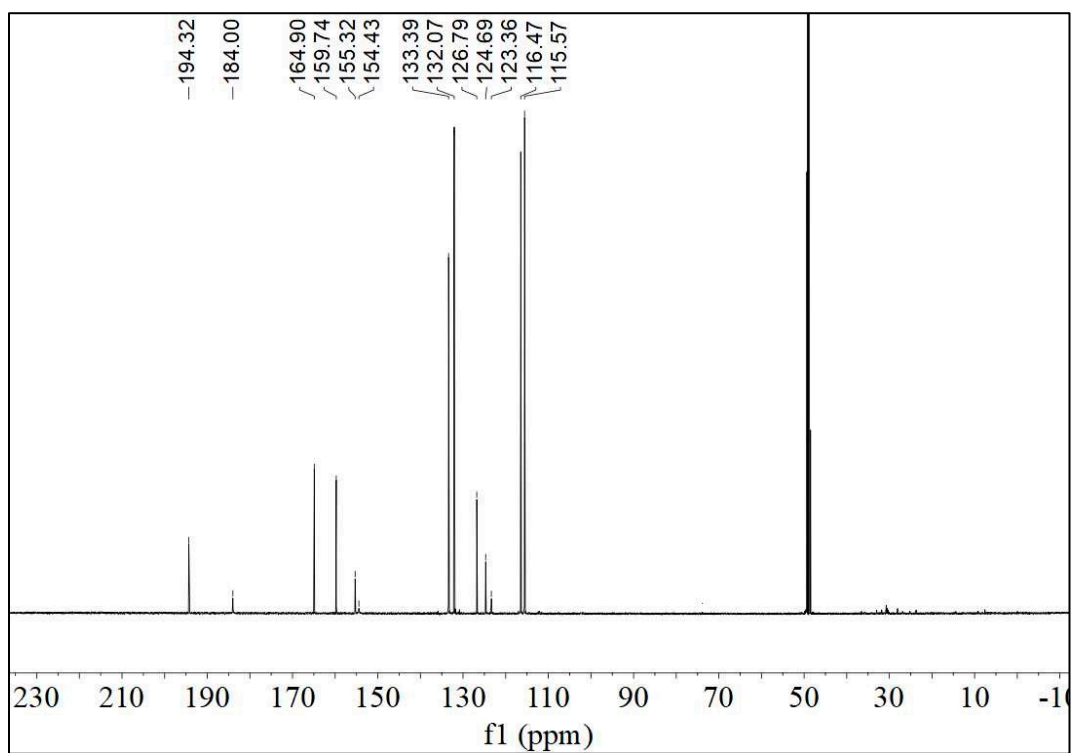

Figure S20 <sup>13</sup>C NMR Spectrum of **11** in Methanol-*d*<sub>4</sub>
